# Supplementary material
Source: PubMed Central journal article supplement (PMC4138740)

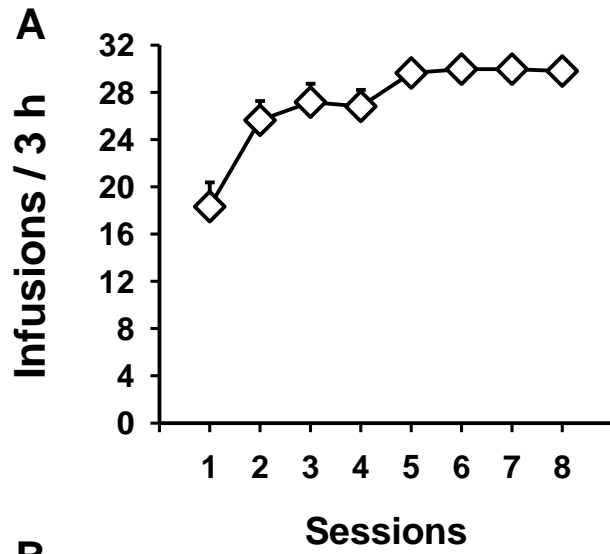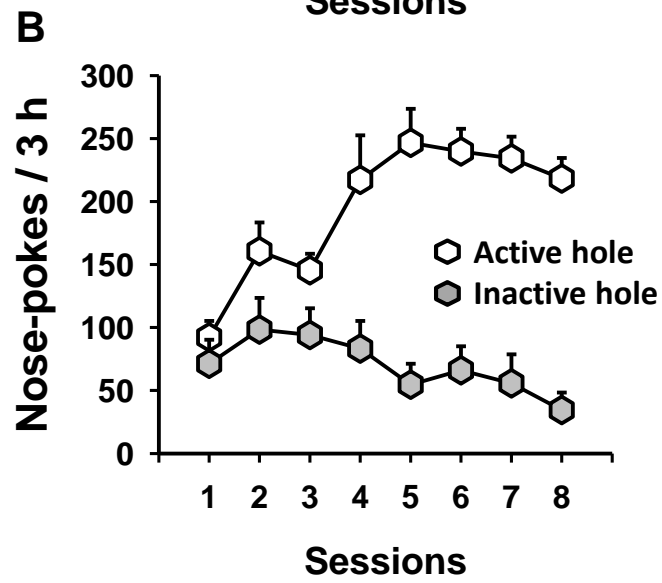

Supplement: npp201466x1.pdf [file npp201466x1.pdf]

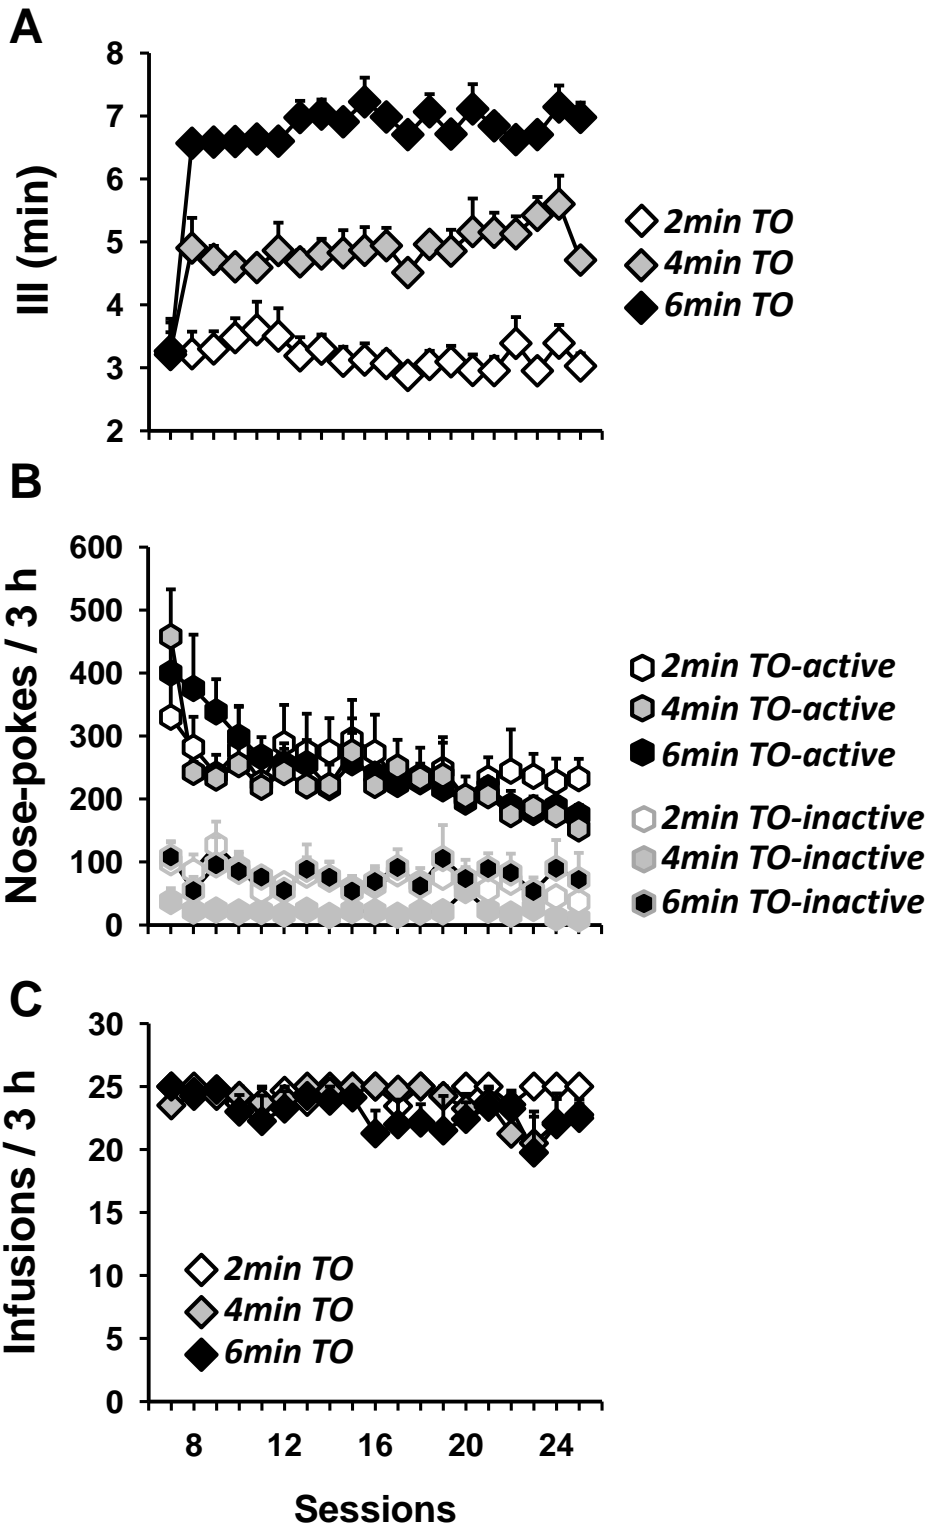

Supplement: npp201466x3.pdf [file npp201466x3.pdf]

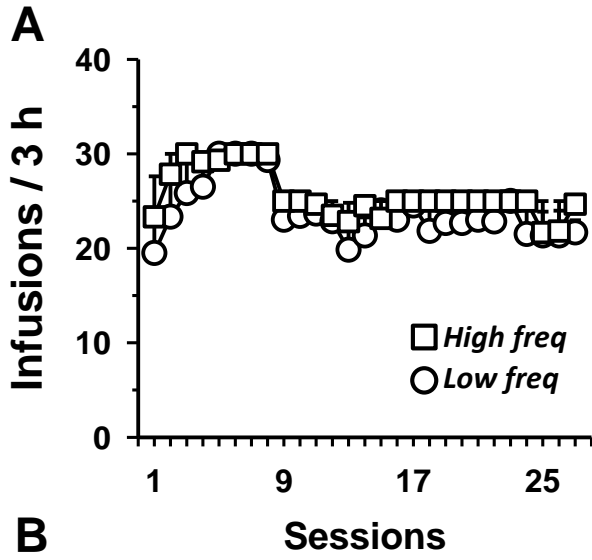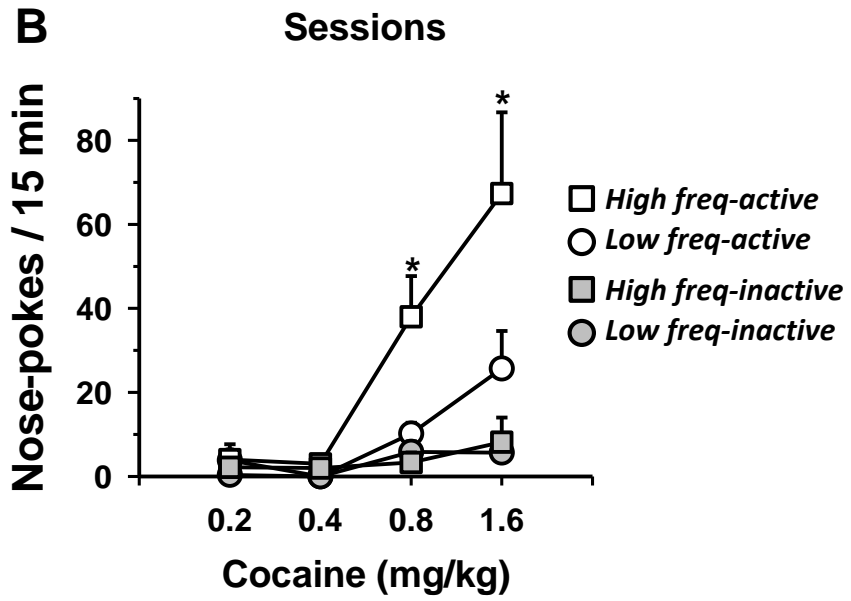

Supplement: npp201466x4.pdf [file npp201466x4.pdf]

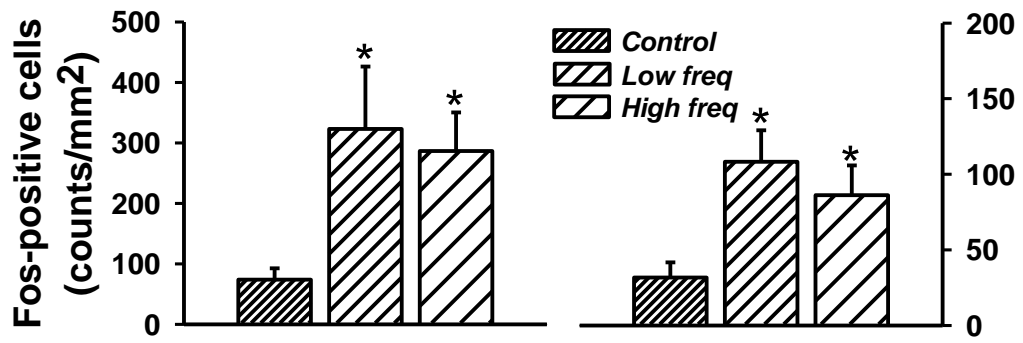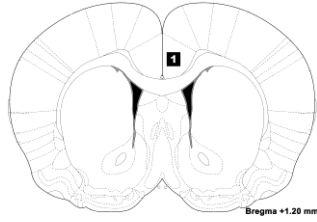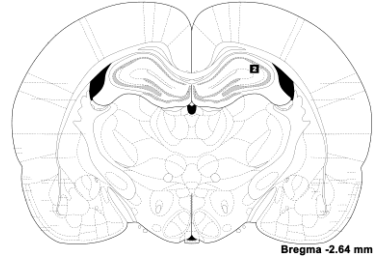

Supplement: npp201466x5.pdf [file npp201466x5.pdf]

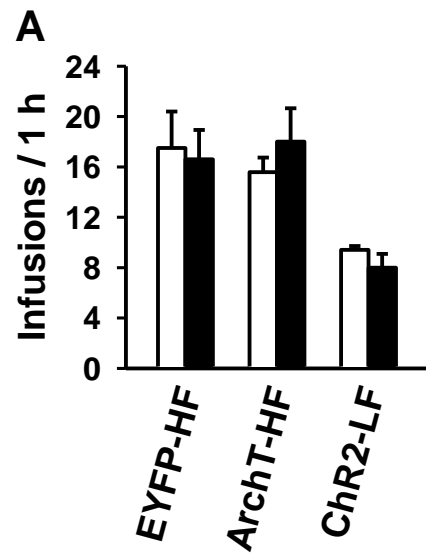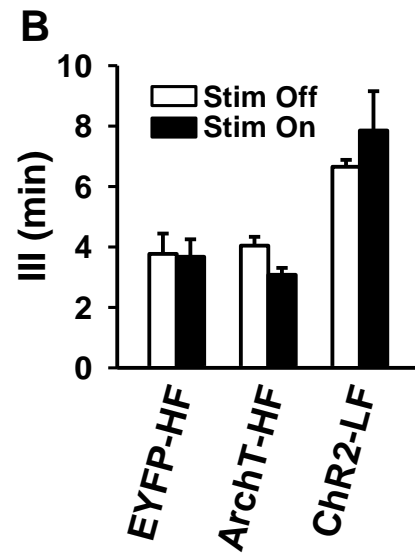

Supplement: npp201466x6.pdf [file npp201466x6.pdf]
